# Supplementary material for: Experimental and computational evidence for α-lactone intermediates in the addition of aqueous bromine to disodium dimethyl-maleate and -fumarate
Source: Royal Society of Chemistry journal article supplement (doi:10.1039/b711538e), 2007-01-01
Supplement: b711538e.pdf [file b711538e.pdf]

## Experimental and computational evidence for $\alpha$ -lactone intermediates in the addition of aqueous bromine to disodium dimethyl-maleate and -fumarate

Necmettin Pirinçcioğlu,<sup>a</sup> James J. Robinson,<sup>b</sup> Mary F. Mahon,<sup>b</sup> J. Grant Buchanan<sup>\*b,c</sup> and Ian H. Williams<sup>\*b,d</sup>

<sup>a</sup> Department of Chemistry, University of Dicle, TR-21280 Diyarbakir, Turkey.

Fax: +90 412 2488039; Tel: +90 412 2488550; E-mail: pirincn@dicle.edu.tr

<sup>b</sup> Department of Chemistry, University of Bath, Bath UK BA2 7AY.

<sup>c</sup> E-mail: j.g.buchanan@bath.ac.uk

<sup>d</sup> Fax: +44 1225 386231; Tel: +44 1225 386625; E-mail: i.h.williams@bath.ac.uk

### Electronic Supplementary Information

#### Cartesian coordinates (Ångström) for optimised structures in PCM water

| Label in Table below | Label in main paper                                |
|----------------------|----------------------------------------------------|
| M1                   | 13                                                 |
| M2                   | 15                                                 |
| M3                   | 17                                                 |
| M4                   | 19                                                 |
| M5                   | 21                                                 |
| M6                   | 23                                                 |
| M7                   | 29                                                 |
| M8                   | neutral bromo- $\beta$ -lactone (Fig. 3a)          |
| M10                  | constrained Cs symmetry version of 27              |
| F1                   | 14                                                 |
| F2                   | 16                                                 |
| F3                   | 18                                                 |
| F4                   | 20                                                 |
| F5                   | 22                                                 |
| F6                   | 24                                                 |
| F7                   | failed attempt to find a frontside TS for 16 -> 23 |
| F8                   | neutral bromo- $\beta$ -lactone (Fig. 3b)          |
| F10                  | 28                                                 |

|           |          |          |           |    |          |            |          |    |          |          |          |
|-----------|----------|----------|-----------|----|----------|------------|----------|----|----------|----------|----------|
| <b>M1</b> |          |          | <b>M2</b> |    |          | <b>M3</b>  |          |    |          |          |          |
| Br        | 0.00000  | 0.45969  | 1.51762   | Br | 0.00000  | 0.00000    | 1.52818  | C  | 0.38877  | -1.18401 | 0.40332  |
| C         | 0.73855  | 0.45969  | -0.51937  | C  | 0.73501  | 0.00000    | -0.52510 | C  | 0.05572  | -0.00602 | -0.52614 |
| C         | 1.53125  | 1.71405  | -0.76408  | C  | 1.47472  | 1.30806    | -0.84335 | C  | 0.71680  | -0.13456 | -1.88949 |
| C         | 1.48595  | -0.85117 | -0.84334  | C  | 1.50157  | -1.26415   | -0.77809 | C  | -0.47028 | -2.35821 | 0.39726  |
| C         | -0.73855 | 0.45969  | -0.51937  | C  | -0.73501 | 0.00000    | -0.52510 | C  | 1.43844  | -1.09941 | 1.47539  |
| C         | -1.48595 | -0.85117 | -0.84334  | C  | -1.47472 | -1.30806   | -0.84335 | C  | -1.49174 | 0.27030  | -0.56641 |
| C         | -1.53125 | 1.71405  | -0.76408  | C  | -1.50157 | 1.26415    | -0.77809 | H  | 0.50339  | 0.75760  | -2.48136 |
| O         | 1.67314  | -0.87514 | -2.08375  | O  | 2.02107  | 1.97880    | 0.04751  | H  | 1.80036  | -0.26043 | -1.79482 |
| O         | -1.67314 | -0.87514 | -2.08375  | O  | -2.02107 | -1.97880   | 0.04751  | H  | 0.30530  | -0.99954 | -2.41946 |
| O         | -1.81468 | -1.64694 | 0.05144   | O  | 1.41669  | 1.47099    | -2.08809 | O  | 0.53886  | -2.53337 | -0.44618 |
| O         | 1.81468  | -1.64694 | 0.05144   | O  | -1.41669 | -1.47099   | -2.08809 | O  | -1.39919 | -3.01614 | 0.78169  |
| H         | 1.05264  | 2.61448  | -0.37424  | H  | 1.64576  | -1.33916   | -1.86415 | H  | 1.62583  | -2.09113 | 1.89848  |
| H         | 2.53016  | 1.61786  | -0.32642  | H  | -1.64576 | 1.33916    | -1.86415 | H  | 2.37282  | -0.68689 | 1.08027  |
| H         | 1.64630  | 1.82073  | -1.85078  | H  | 0.96700  | -2.15528   | -0.43765 | H  | 1.08148  | -0.44399 | 2.27728  |
| H         | -1.05264 | 2.61448  | -0.37424  | H  | -0.96700 | 2.15528    | -0.43765 | O  | -2.08616 | 0.12060  | 0.52847  |
| H         | -2.53016 | 1.61786  | -0.32642  | H  | 2.48586  | -1.21370   | -0.30158 | O  | -1.96223 | 0.61502  | -1.67535 |
| H         | -1.64630 | 1.82073  | -1.85078  | H  | -2.48586 | 1.21370    | -0.30158 | Br | 0.79004  | 1.68910  | 0.28676  |
| <b>M4</b> |          |          | <b>M5</b> |    |          | <b>M6</b>  |          |    |          |          |          |
| C         | 1.61316  | 0.79880  | -1.31569  | O  | -1.34463 | 0.14409    | 2.02923  | C  | -1.03977 | -0.13570 | -1.66733 |
| C         | 0.78981  | 0.15864  | -0.20719  | C  | -0.86386 | -0.05942   | 0.19350  | C  | -0.40411 | 0.12335  | -0.31902 |
| C         | 1.55520  | -1.07906 | 0.38282   | O  | -0.05123 | -1.25423   | -1.58728 | C  | 1.14627  | 0.16374  | -0.15866 |
| O         | 2.59984  | -0.85040 | 1.02599   | C  | 0.92188  | -0.48888   | -1.29154 | C  | 1.84163  | -0.62831 | 0.92594  |
| Br        | 0.59830  | 1.56776  | 1.22359   | C  | 0.60668  | 0.22893    | 0.05031  | C  | -0.34145 | 1.56554  | 0.16833  |
| C         | -0.61443 | -0.24661 | -0.58932  | O  | -1.61572 | -2.08477   | 1.48303  | O  | -1.13566 | 2.44707  | 0.38981  |
| C         | -1.57993 | -0.72781 | 0.46523   | C  | -1.32671 | -0.91507   | 1.30107  | O  | 0.99624  | 1.59803  | 0.29955  |
| O         | -1.31770 | 0.80401  | -1.58045  | Br | 0.88369  | 2.20064    | -0.15265 | Br | -1.34395 | -0.94617 | 1.06454  |
| C         | -0.96267 | -0.40266 | -1.99356  | C  | -1.90223 | 0.64357    | -0.62623 | C  | 1.91171  | 0.06536  | -1.50450 |
| O         | -1.04386 | -1.03109 | -3.01543  | H  | -1.48097 | 0.98345    | -1.57444 | O  | 2.39259  | 1.11571  | -1.98434 |
| O         | 1.04126  | -2.18157 | 0.06629   | H  | -2.75043 | -0.02054   | -0.82016 | O  | 1.96372  | -1.10935 | -1.94893 |
| H         | 1.13248  | 1.69609  | -1.71471  | H  | -2.26329 | 1.52189    | -0.07902 | H  | -2.10063 | 0.13194  | -1.63568 |
| H         | 2.59674  | 1.06406  | -0.92045  | O  | 1.99410  | -0.31333   | -1.88317 | H  | -0.54771 | 0.47518  | -2.43426 |
| H         | 1.75845  | 0.07660  | -2.13146  | C  | 1.51367  | -0.23867   | 1.17619  | H  | -0.93692 | -1.18757 | -1.94672 |
| H         | -1.03552 | -1.27386 | 1.23869   | H  | 2.55331  | -0.04337   | 0.89941  | H  | 2.89741  | -0.33437 | 0.96302  |
| H         | -2.33892 | -1.38959 | 0.03703   | H  | 1.39057  | -1.31993   | 1.32681  | H  | 1.39221  | -0.44358 | 1.90609  |
| H         | -2.07832 | 0.13205  | 0.92576   | H  | 1.28475  | 0.27628    | 2.11266  | H  | 1.78952  | -1.69632 | 0.69789  |
| <b>M7</b> |          |          | <b>M8</b> |    |          | <b>M10</b> |          |    |          |          |          |
| O         | 0.56739  | -2.19850 | 0.12070   | Br | 0.34286  | -0.68575   | -1.80886 | C  | 0.80134  | -2.49601 | 0.12705  |
| C         | -0.81334 | -0.28015 | -0.47993  | O  | 0.34286  | -0.68575   | 1.75059  | C  | -0.46682 | -2.18729 | -0.19988 |
| C         | 0.66024  | -0.09178 | -0.65279  | O  | 2.49464  | -0.68575   | 0.93164  | C  | 1.92593  | -2.11443 | -0.82336 |
| C         | 1.30864  | -1.16649 | 0.22706   | O  | -2.21416 | 1.74609    | 0.90864  | O  | 3.10995  | -2.39066 | -0.47656 |
| O         | 2.37844  | -1.02162 | 0.82589   | H  | -2.59640 | 2.52030    | 1.41421  | O  | 1.58411  | -1.53437 | -1.89735 |
| H         | 1.01740  | -1.14573 | -2.50046  | O  | -0.97166 | 1.46733    | 2.77784  | C  | -0.87398 | -1.67431 | -1.55418 |
| C         | 1.21077  | -0.15448 | -2.07324  | C  | 1.33099  | -0.40454   | 0.85885  | O  | -1.14840 | -0.38852 | -1.71991 |
| H         | 2.29268  | 0.00492  | -2.03960  | C  | 0.41711  | 0.32384    | -0.12328 | O  | -1.19450 | -2.46476 | -2.44832 |
| H         | 0.77104  | 0.60829  | -2.72120  | C  | -0.70483 | -0.06235   | 0.90867  | C  | -1.65808 | -2.53333 | 0.66285  |
| Br        | 0.92689  | 1.78337  | -0.01158  | C  | 0.73154  | 1.77732    | -0.41266 | C  | 1.15365  | -3.17374 | 1.42841  |
| C         | -1.41466 | -0.58672 | 0.89986   | H  | 0.80370  | 2.35293    | 0.51887  | Br | -0.60159 | 0.95098  | -0.25762 |
| O         | -2.38653 | -1.37294 | 0.83198   | H  | -0.04431 | 2.22035    | -1.04405 | Br | 0.02568  | 2.76397  | 1.52121  |
| O         | -0.88920 | -0.02629 | 1.88342   | H  | 1.69404  | 1.84499    | -0.92959 | H  | -1.40689 | -2.49829 | 1.72812  |
| H         | -1.59976 | -1.05678 | -2.24626  | C  | -1.77147 | -1.07682   | 0.54728  | H  | -2.01871 | -3.54784 | 0.43569  |
| C         | -1.72375 | -0.15035 | -1.62328  | H  | -1.31218 | -1.99320   | 0.16808  | H  | -2.49516 | -1.84670 | 0.48499  |
| H         | -1.44238 | 0.68949  | -2.27221  | H  | -2.44222 | -0.66979   | -0.21459 | H  | 0.89041  | -2.55473 | 2.29859  |
| H         | -2.76829 | -0.09784 | -1.31265  | H  | -2.35952 | -1.32294   | 1.43864  | H  | 2.22824  | -3.36603 | 1.46415  |
|           |          |          |           | C  | -1.29522 | 1.13540    | 1.65777  | H  | 0.62554  | -4.13023 | 1.54360  |

|    |          |          |          |    |          |          |          |    |          |          |          |
|----|----------|----------|----------|----|----------|----------|----------|----|----------|----------|----------|
| F1 |          |          | F2       |    |          | F3       |          |    |          |          |          |
| Br | 0.00000  | 0.00000  | 1.52818  | C  | -0.93777 | 0.39516  | -2.09687 | C  | -0.30482 | 0.48727  | -1.93508 |
| C  | 0.73501  | 0.00000  | -0.5251  | C  | -0.99936 | 0.46395  | -0.59615 | C  | -0.22963 | 0.49144  | -0.41084 |
| C  | 1.47472  | 1.30806  | -0.84335 | Br | 1.56961  | 0.39156  | 0.42239  | C  | 1.19591  | 0.55862  | 0.14043  |
| C  | 1.50157  | -1.26415 | -0.77809 | C  | -0.21667 | -0.54217 | 0.23487  | C  | 1.60942  | 1.66419  | 1.07280  |
| C  | -0.73501 | 0.00000  | -0.5251  | O  | -1.18630 | -2.41877 | -0.74498 | H  | 0.96579  | 1.6395   | 1.96138  |
| C  | -1.47472 | -1.30806 | -0.84335 | C  | -0.06111 | -1.91034 | -0.50838 | H  | 1.48227  | 2.63948  | 0.59428  |
| C  | -1.50157 | 1.26415  | -0.77809 | O  | 1.07673  | -2.35653 | -0.76137 | H  | 2.64734  | 1.53283  | 1.39265  |
| O  | 2.02107  | 1.97880  | 0.04751  | C  | -1.57102 | 1.62667  | 0.05753  | O  | 2.32382  | 0.31066  | -1.00258 |
| O  | -2.02107 | -1.97880 | 0.04751  | O  | -2.50736 | 0.70895  | -0.07266 | O  | 2.57364  | -1.61503 | 0.31095  |
| O  | 1.41669  | 1.47099  | -2.08809 | O  | -1.48331 | 2.74193  | 0.50645  | C  | 2.10760  | -0.56071 | -0.04117 |
| O  | -1.41669 | -1.47099 | -2.08809 | C  | -0.74462 | -0.75833 | 1.64767  | Br | -0.96383 | -1.30345 | 0.17601  |
| H  | 1.64576  | -1.33916 | -1.86415 | H  | -1.46168 | -0.50164 | -2.44388 | O  | -1.95588 | 1.38106  | 1.07251  |
| H  | -1.64576 | 1.33916  | -1.86415 | H  | -1.73151 | -1.22813 | 1.59296  | C  | -1.11727 | 1.64649  | 0.18728  |
| H  | 0.96700  | -2.15528 | -0.43765 | H  | 0.10806  | 0.31949  | -2.41681 | O  | -0.83438 | 2.7543   | -0.33162 |
| H  | -0.96700 | 2.15528  | -0.43765 | H  | -0.82222 | 0.17929  | 2.20799  | H  | -1.35429 | 0.43584  | -2.24089 |
| H  | 2.48586  | -1.21370 | -0.30158 | H  | -1.38261 | 1.28252  | -2.55599 | H  | 0.12438  | 1.41711  | -2.31898 |
| H  | -2.48586 | 1.21370  | -0.30158 | H  | -0.06806 | -1.42895 | 2.18686  | H  | 0.23185  | -0.36069 | -2.36705 |
| F4 |          |          | F5       |    |          | F6       |          |    |          |          |          |
| C  | -0.01791 | -0.02951 | -0.02345 | C  | 0.00000  | 0.00000  | 0.00000  | C  | 0.02930  | -0.05625 | -0.02811 |
| C  | -0.02810 | 0.12414  | 1.47665  | C  | 0.00000  | 0.00000  | 1.50069  | C  | 0.07914  | -0.10477 | 1.47961  |
| C  | 1.29989  | -0.02166 | 2.18932  | C  | 1.32319  | 0.00000  | 2.21665  | C  | 1.42373  | 0.09618  | 2.21171  |
| C  | 2.31237  | 1.03729  | 1.79507  | C  | 2.34819  | 1.00670  | 1.73403  | C  | 2.47969  | 1.07527  | 1.75317  |
| O  | -0.87744 | 1.41953  | 1.91768  | C  | -1.27750 | 0.21758  | 2.19466  | C  | -1.25087 | 0.12968  | 2.19101  |
| C  | -1.29327 | 0.18637  | 2.17858  | O  | -2.16847 | -0.46070 | 2.67590  | O  | -1.87486 | -0.80676 | 2.71191  |
| O  | -2.26068 | -0.31665 | 2.68696  | O  | -1.09266 | 1.48045  | 2.03791  | O  | -1.50589 | 1.38214  | 2.25176  |
| C  | 1.78790  | -1.51021 | 2.02313  | C  | 1.71824  | -1.50542 | 2.08850  | C  | 1.59227  | -1.38710 | 2.07540  |
| O  | 3.02350  | -1.67964 | 1.94809  | O  | 2.88395  | -1.86474 | 2.30081  | O  | 2.48848  | -2.16561 | 2.32896  |
| Br | 1.01648  | 0.15027  | 4.17548  | Br | 1.07043  | 0.26271  | 4.18232  | Br | 1.14040  | 0.39900  | 4.16216  |
| O  | 0.86464  | -2.36060 | 1.99386  | O  | 0.70524  | -2.19540 | 1.75422  | O  | 0.35910  | -1.60813 | 1.66694  |
| H  | 0.57565  | 0.76752  | -0.48536 | H  | 0.13644  | 1.02684  | -0.36160 | H  | 0.02383  | 0.99025  | -0.36315 |
| H  | -1.03524 | 0.00931  | -0.42348 | H  | -0.94722 | -0.38486 | -0.38885 | H  | -0.88937 | -0.53383 | -0.38322 |
| H  | 0.42235  | -0.99513 | -0.29114 | H  | 0.82136  | -0.60662 | -0.38987 | H  | 0.89413  | -0.55409 | -0.47470 |
| H  | 2.54654  | 0.94877  | 0.72735  | H  | 2.53780  | 0.86696  | 0.66203  | H  | 2.70058  | 0.93007  | 0.68753  |
| H  | 3.23999  | 0.88433  | 2.35002  | H  | 3.28835  | 0.84728  | 2.26917  | H  | 3.40453  | 0.91173  | 2.31635  |
| H  | 1.92953  | 2.04353  | 1.99438  | H  | 2.00076  | 2.03111  | 1.90220  | H  | 2.13820  | 2.10205  | 1.90846  |
| F7 |          |          | F8       |    |          | F10      |          |    |          |          |          |
| C  | 0.00000  | 0.00000  | 0.00000  | C  | 0.00000  | 0.00000  | 0.00000  | C  | 1.91223  | -1.90346 | 0.54122  |
| C  | 0.00000  | 0.00000  | 1.52059  | C  | 0.00000  | 0.00000  | 1.51070  | C  | 0.58960  | -1.85859 | 0.29283  |
| Br | 1.90826  | 0.00000  | 2.11940  | Br | 1.85838  | 0.00000  | 2.18333  | C  | 0.03102  | -1.82719 | -1.09407 |
| C  | -0.73909 | 1.12069  | 2.20307  | C  | -0.74475 | 1.10253  | 2.25851  | O  | -0.52863 | -0.77149 | -1.67578 |
| C  | -1.51151 | 2.07238  | 1.38268  | O  | -0.75269 | 2.30163  | 2.27525  | O  | -0.01010 | -2.78565 | -1.86244 |
| O  | -0.42230 | 2.73089  | 1.21187  | O  | -1.51228 | 0.24783  | 2.98913  | C  | -0.44044 | -1.93009 | 1.35932  |
| C  | -0.74298 | -1.23633 | 2.09297  | C  | -0.94831 | -0.94900 | 2.32455  | C  | 2.91095  | -1.74631 | -0.54951 |
| O  | -1.84183 | -0.84986 | 2.60463  | C  | -0.30005 | -1.84799 | 3.37831  | H  | 0.07648  | -2.08789 | 2.33906  |
| C  | -0.56475 | 1.42889  | 3.65817  | O  | 0.18838  | -2.95137 | 2.80859  | H  | -1.01236 | -0.99353 | 1.39797  |
| O  | -0.28721 | -2.38066 | 1.97891  | C  | -2.02184 | -1.68693 | 1.54294  | H  | -1.14252 | -2.75414 | 1.18556  |
| O  | -2.66859 | 2.22411  | 1.02965  | O  | -0.27287 | -1.59610 | 4.56337  | H  | 3.45044  | -0.79799 | -0.41797 |
| H  | -1.03470 | 0.00948  | -0.36933 | H  | 0.47498  | -0.90977 | -0.38121 | H  | 3.65537  | -2.5531  | -0.51456 |
| H  | 0.52894  | 0.86821  | -0.40135 | H  | 0.55472  | 0.86862  | -0.36863 | H  | 2.47069  | -1.74221 | -1.55577 |
| H  | 0.48288  | -0.91393 | -0.35721 | H  | -1.02300 | 0.05868  | -0.38794 | Br | -0.81910 | -0.77747 | -0.71983 |
| H  | -1.51482 | 1.75880  | 4.09144  | H  | -2.72486 | -2.15959 | 2.23860  | C  | 2.51762  | -2.13565 | 1.93968  |
| H  | -0.19753 | 0.55547  | 4.20163  | H  | -1.56982 | -2.46658 | 0.92207  | O  | 3.76616  | -2.19836 | 2.06109  |
| H  | 0.16762  | 2.23675  | 3.77336  | H  | -2.58175 | -0.99497 | 0.90660  | O  | 1.77649  | -2.29313 | 2.94652  |
|    |          |          |          | H  | 0.57652  | -3.55531 | 3.49946  | Br | -1.40797 | 2.68580  | 0.02069  |

## Crystallographic data for bromohydrins

### *erythro*-2-bromo-3-hydroxy-2,3-dimethylsuccinic acid

Table 1. Crystal data and structure refinement for compound 7.

|                                   |                                                  |
|-----------------------------------|--------------------------------------------------|
| Identification code               | CCDC 652216                                      |
| Empirical formula                 | C <sub>6</sub> H <sub>9</sub> Br O <sub>5</sub>  |
| Formula weight                    | 241.04                                           |
| Temperature                       | 30(2) K                                          |
| Wavelength                        | 0.71073 Å                                        |
| Crystal system                    | Monoclinic                                       |
| Space group                       | P2 <sub>1</sub> /c                               |
| Unit cell dimensions              | a = 11.4120(5) Å $\alpha$ = 90°                  |
|                                   | b = 5.8870(3) Å $\beta$ = 93.337(2)°             |
|                                   | c = 12.3790(7) Å $\gamma$ = 90°                  |
| Volume                            | 830.24(7) Å <sup>3</sup>                         |
| Z                                 | 4                                                |
| Density (calculated)              | 1.928 Mg/m <sup>3</sup>                          |
| Absorption coefficient            | 4.932 mm <sup>-1</sup>                           |
| F(000)                            | 480                                              |
| Crystal size                      | 0.20 x 0.20 x 0.10 mm                            |
| Theta range for data collection   | 3.30 to 27.46°                                   |
| Index ranges                      | -14 ≤ h ≤ 12; -6 ≤ k ≤ 7; -16 ≤ l ≤ 14           |
| Reflections collected             | 5751                                             |
| Independent reflections           | 1883 [R(int) = 0.0707]                           |
| Reflections observed (>2σ)        | 1420                                             |
| Data Completeness                 | 0.988                                            |
| Max. and min. transmission        | 0.6383 and 0.4387                                |
| Refinement method                 | Full-matrix least-squares on F <sup>2</sup>      |
| Data / restraints / parameters    | 1883 / 0 / 115                                   |
| Goodness-of-fit on F <sup>2</sup> | 1.021                                            |
| Final R indices [I > 2σ(I)]       | R <sub>1</sub> = 0.0381 wR <sub>2</sub> = 0.0761 |
| R indices (all data)              | R <sub>1</sub> = 0.0626 wR <sub>2</sub> = 0.0832 |
| Largest diff. peak and hole       | 0.793 and -0.722 eÅ <sup>-3</sup>                |

Hydrogen bonds with H..A < r(A) + 2.000 Angstroms and <DHA > 110 deg.

| D-H   | d(D-H) | d(H..A) | <DHA | d(D..A)  | A                          |
|-------|--------|---------|------|----------|----------------------------|
| O2-H2 | 0.840  | 1.91    | 162  | 2.716(3) | O3 [ -x+1, -y, -z+1 ]      |
| O4-H4 | 0.840  | 1.79    | 170  | 2.618(3) | O5 [ x, -y+1/2, z+1/2 ]    |
| O5-H5 | 0.840  | 2.15    | 117  | 2.629(3) | O1                         |
| O5-H5 | 0.840  | 2.15    | 140  | 2.841(3) | O1 [ -x+1, y+1/2, -z+1/2 ] |

Table 2. Atomic coordinates ( $\times 10^4$ ) and equivalent isotropic displacement parameters ( $\text{\AA}^2 \times 10^3$ ) for **7**. U(eq) is defined as one third of the trace of the orthogonalized Uij tensor.

| Atom  | x       | y        | z       | U(eq) |
|-------|---------|----------|---------|-------|
| Br(1) | 752(1)  | 1932(1)  | 3276(1) | 12(1) |
| O(1)  | 5081(2) | 0(4)     | 3056(2) | 12(1) |
| O(2)  | 4235(2) | -2377(4) | 4189(2) | 13(1) |
| O(3)  | 3597(2) | 2429(4)  | 4781(2) | 11(1) |
| O(4)  | 1978(2) | 1601(4)  | 5651(2) | 13(1) |
| O(5)  | 3087(2) | 1968(4)  | 2433(2) | 12(1) |
| C(1)  | 4221(3) | -800(6)  | 3421(3) | 11(1) |
| C(2)  | 2975(3) | -162(6)  | 2974(3) | 11(1) |
| C(3)  | 2095(3) | 110(6)   | 3876(3) | 12(1) |
| C(4)  | 2632(3) | 1546(6)  | 4821(3) | 10(1) |
| C(5)  | 2561(3) | -1893(6) | 2091(3) | 8(1)  |
| C(6)  | 1580(3) | -2121(6) | 4279(3) | 12(1) |

Table 3. Bond lengths [ $\text{\AA}$ ] and angles [ $^\circ$ ] for **7**

|                 |          |                 |          |
|-----------------|----------|-----------------|----------|
| Br(1)-C(3)      | 1.979(3) | O(1)-C(1)       | 1.200(4) |
| O(2)-C(1)       | 1.328(4) | O(3)-C(4)       | 1.221(4) |
| O(4)-C(4)       | 1.305(4) | O(5)-C(2)       | 1.430(4) |
| C(1)-C(2)       | 1.542(4) | C(2)-C(5)       | 1.548(5) |
| C(2)-C(3)       | 1.553(5) | C(3)-C(6)       | 1.534(5) |
| C(3)-C(4)       | 1.541(5) |                 |          |
|                 |          |                 |          |
| O(1)-C(1)-O(2)  | 124.6(3) | O(1)-C(1)-C(2)  | 121.8(3) |
| O(2)-C(1)-C(2)  | 113.5(3) | O(5)-C(2)-C(1)  | 106.0(3) |
| O(5)-C(2)-C(5)  | 106.2(3) | C(1)-C(2)-C(5)  | 109.3(3) |
| O(5)-C(2)-C(3)  | 109.0(3) | C(1)-C(2)-C(3)  | 112.9(3) |
| C(5)-C(2)-C(3)  | 113.1(3) | C(6)-C(3)-C(4)  | 111.5(3) |
| C(6)-C(3)-C(2)  | 114.9(3) | C(4)-C(3)-C(2)  | 110.9(3) |
| C(6)-C(3)-Br(1) | 106.5(2) | C(4)-C(3)-Br(1) | 104.7(2) |
| C(2)-C(3)-Br(1) | 107.7(2) | O(3)-C(4)-O(4)  | 125.4(3) |
| O(3)-C(4)-C(3)  | 121.5(3) | O(4)-C(4)-C(3)  | 113.0(3) |

Symmetry transformations used to generate equivalent atoms:

Table 4. Anisotropic displacement parameters ( $\text{\AA}^2 \times 10^3$ ) for **7** The anisotropic displacement factor exponent takes the form:  $-2 \text{ gpi}^2 [ \text{h}^2 \text{ a}^{*2} \text{ U11} + \dots + 2 \text{ h k a}^* \text{ b}^* \text{ U}$

| Atom  | U11   | U22   | U33   | U23   | U13   | U12   |
|-------|-------|-------|-------|-------|-------|-------|
| Br(1) | 10(1) | 16(1) | 9(1)  | 0(1)  | -3(1) | 1(1)  |
| O(1)  | 12(1) | 16(1) | 9(1)  | 1(1)  | -1(1) | 1(1)  |
| O(2)  | 10(1) | 17(1) | 11(1) | 2(1)  | -4(1) | 1(1)  |
| O(3)  | 13(1) | 14(1) | 7(1)  | 0(1)  | -1(1) | 0(1)  |
| O(4)  | 12(1) | 21(2) | 7(1)  | -5(1) | -2(1) | -2(1) |
| O(5)  | 10(1) | 16(1) | 9(1)  | 5(1)  | -3(1) | -3(1) |
| C(1)  | 16(2) | 11(2) | 6(2)  | -7(2) | -3(2) | 2(2)  |
| C(2)  | 12(2) | 10(2) | 9(2)  | 0(2)  | -4(1) | -4(2) |
| C(3)  | 9(2)  | 20(2) | 6(2)  | -2(2) | -5(1) | 4(2)  |
| C(4)  | 13(2) | 10(2) | 8(2)  | 1(2)  | -3(1) | 5(2)  |
| C(5)  | 9(2)  | 6(2)  | 10(2) | -5(2) | 7(1)  | -4(2) |
| C(6)  | 12(2) | 13(2) | 9(2)  | 1(2)  | -2(2) | -3(2) |

Table 5. Hydrogen coordinates ( $\times 10^4$ ) and isotropic displacement parameters ( $\text{\AA}^2 \times 10^3$ ) for **7**.

| Atom  | x    | y     | z    | U(eq) |
|-------|------|-------|------|-------|
| H(2)  | 4932 | -2631 | 4414 | 15    |
| H(4)  | 2358 | 2189  | 6182 | 16    |
| H(5)  | 3777 | 2452  | 2539 | 15    |
| H(5A) | 1777 | -1471 | 1793 | 12    |
| H(5B) | 2534 | -3415 | 2409 | 12    |
| H(5C) | 3111 | -1889 | 1511 | 12    |
| H(6A) | 2213 | -3068 | 4603 | 17    |
| H(6B) | 1186 | -2930 | 3668 | 17    |
| H(6C) | 1012 | -1790 | 4821 | 17    |

**threo-2-bromo-3-hydroxy-2,3-dimethylsuccinic acid**

Table 6. Crystal data and structure refinement for compound **8**.

|                                      |                                                    |
|--------------------------------------|----------------------------------------------------|
| Identification code                  | CCDC 652217                                        |
| Empirical formula                    | C <sub>6</sub> H <sub>11</sub> BrO <sub>6</sub>    |
| Formula weight                       | 259.06                                             |
| Temperature                          | 150(2) K                                           |
| Wavelength                           | 0.71073 Å                                          |
| Crystal system                       | Triclinic                                          |
| Space group                          | P-1                                                |
| Unit cell dimensions                 | a = 6.2390(3) Å $\alpha$ = 85.342(2) <sup>o</sup>  |
|                                      | b = 7.2280(4) Å $\beta$ = 82.801(2) <sup>o</sup>   |
|                                      | c = 11.1710(8) Å $\gamma$ = 69.105(3) <sup>o</sup> |
| Volume                               | 466.56(5) Å <sup>3</sup>                           |
| Z                                    | 2                                                  |
| Density (calculated)                 | 1.844 Mg/m <sup>3</sup>                            |
| Absorption coefficient               | 4.403 mm <sup>-1</sup>                             |
| F(000)                               | 260                                                |
| Crystal size                         | 0.20 x 0.20 x 0.10 mm                              |
| Theta range for data collection      | 3.51 to 27.34 <sup>o</sup>                         |
| Index ranges                         | -8 <= h <= 8; -9 <= k <= 9; -14 <= l <= 14         |
| Reflections collected                | 8440                                               |
| Independent reflections              | 2075 [R(int) = 0.0683]                             |
| Reflections observed (>2 $\sigma$ )  | 1623                                               |
| Data Completeness                    | 0.982                                              |
| Max. and min. transmission           | 0.652 and 0.502                                    |
| Refinement method                    | Full-matrix least-squares on F <sup>2</sup>        |
| Data / restraints / parameters       | 2075 / 2 / 134                                     |
| Goodness-of-fit on F <sup>2</sup>    | 1.000                                              |
| Final R indices [I > 2 $\sigma$ (I)] | R1 = 0.0378 wR2 = 0.0757                           |
| R indices (all data)                 | R1 = 0.0614 wR2 = 0.0839                           |
| Largest diff. peak and hole          | 0.677 and -0.759 eÅ <sup>-3</sup>                  |

**Notes: Lattice dominated by hydrogen bonding. Included water acts as a 'cement'. Wayer hydrogens located and refined at 0.89 Å from O6.**

Hydrogen bonds with H..A < r(A) + 2.000 Angstroms and <DHA > 110 deg.

| D-H    | d(D-H) | d(H..A) | <DHA | d(D..A)  | A                     |
|--------|--------|---------|------|----------|-----------------------|
| O2-H2  | 0.840  | 1.78    | 167  | 2.608(4) | O6 [ x, y+1, z ]      |
| O4-H4  | 0.840  | 1.82    | 171  | 2.654(4) | O3 [ -x, -y, -z+1 ]   |
| O5-H5  | 0.840  | 2.08    | 147  | 2.819(4) | O6                    |
| O5-H5  | 0.840  | 2.75    | 114  | 3.178(3) | Br1                   |
| O6-H6A | 0.884  | 1.93    | 178  | 2.816(4) | O1 [ -x+1, -y, -z+2 ] |
| O6-H6B | 0.890  | 1.86    | 173  | 2.749(4) | O5 [ -x, -y, -z+2 ]   |

Table 7. Atomic coordinates ( $\times 10^4$ ) and equivalent isotropic displacement parameters ( $\text{\AA}^2 \times 10^3$ ) for **8**. U(eq) is defined as one third of the trace of the orthogonalized Uij tensor.

| Atom  | x        | y        | z       | U(eq) |
|-------|----------|----------|---------|-------|
| Br(1) | 5535(1)  | 289(1)   | 7242(1) | 29(1) |
| O(1)  | 2540(4)  | 3213(4)  | 9630(2) | 34(1) |
| O(2)  | 2197(4)  | 5624(3)  | 8197(2) | 35(1) |
| O(3)  | 191(4)   | 2071(3)  | 5242(2) | 31(1) |
| O(4)  | 2057(4)  | -789(3)  | 6173(2) | 33(1) |
| O(5)  | 362(4)   | 1435(3)  | 8446(2) | 25(1) |
| O(6)  | 3000(4)  | -2083(3) | 9634(2) | 28(1) |
| C(1)  | 2007(5)  | 3939(5)  | 8654(3) | 27(1) |
| C(2)  | 921(5)   | 3019(5)  | 7808(3) | 25(1) |
| C(3)  | 2637(5)  | 2192(5)  | 6673(3) | 25(1) |
| C(4)  | 1523(6)  | 1113(5)  | 5958(3) | 26(1) |
| C(5)  | -1363(5) | 4555(5)  | 7496(3) | 28(1) |
| C(6)  | 3302(6)  | 3717(5)  | 5836(3) | 27(1) |

Table 8. Bond lengths [ $\text{\AA}$ ] and angles [ $^\circ$ ] for **8**.

|                 |          |
|-----------------|----------|
| Br(1)-C(3)      | 1.984(3) |
| O(1)-C(1)       | 1.204(4) |
| O(2)-C(1)       | 1.321(4) |
| O(3)-C(4)       | 1.215(4) |
| O(4)-C(4)       | 1.303(4) |
| O(5)-C(2)       | 1.425(4) |
| C(1)-C(2)       | 1.543(5) |
| C(2)-C(5)       | 1.522(4) |
| C(2)-C(3)       | 1.561(4) |
| C(3)-C(6)       | 1.524(4) |
| C(3)-C(4)       | 1.535(5) |
| O(1)-C(1)-O(2)  | 124.9(3) |
| O(1)-C(1)-C(2)  | 123.0(3) |
| O(2)-C(1)-C(2)  | 112.1(3) |
| O(5)-C(2)-C(5)  | 105.9(2) |
| O(5)-C(2)-C(1)  | 108.9(3) |
| C(5)-C(2)-C(1)  | 108.9(3) |
| O(5)-C(2)-C(3)  | 108.9(2) |
| C(5)-C(2)-C(3)  | 113.2(3) |
| C(1)-C(2)-C(3)  | 110.8(2) |
| C(6)-C(3)-C(4)  | 109.0(3) |
| C(6)-C(3)-C(2)  | 116.0(3) |
| C(4)-C(3)-C(2)  | 107.2(2) |
| C(6)-C(3)-Br(1) | 106.7(2) |
| C(4)-C(3)-Br(1) | 110.0(2) |
| C(2)-C(3)-Br(1) | 107.9(2) |
| O(3)-C(4)-O(4)  | 124.0(3) |
| O(3)-C(4)-C(3)  | 118.6(3) |
| O(4)-C(4)-C(3)  | 117.3(3) |

Symmetry transformations used to generate equivalent atoms:



Table 9. Anisotropic displacement parameters ( $\text{\AA}^2 \times 10^3$ ) for **8**. The anisotropic displacement factor exponent takes the form:  $-2 \text{ gpi}^2 [ \text{h}^2 \text{ a}^{*2} \text{ U11} + \dots + 2 \text{ h k a}^* \text{ b}^* \text{ U}$

| Atom  | U11   | U22   | U33   | U23   | U13    | U12    |
|-------|-------|-------|-------|-------|--------|--------|
| Br(1) | 18(1) | 29(1) | 38(1) | 1(1)  | -2(1)  | -4(1)  |
| O(1)  | 30(1) | 35(1) | 34(2) | -2(1) | -10(1) | -7(1)  |
| O(2)  | 45(2) | 31(1) | 34(2) | -4(1) | -7(1)  | -19(1) |
| O(3)  | 34(1) | 23(1) | 37(1) | 0(1)  | -14(1) | -8(1)  |
| O(4)  | 41(1) | 21(1) | 42(2) | 0(1)  | -17(1) | -11(1) |
| O(5)  | 19(1) | 27(1) | 29(1) | 3(1)  | -1(1)  | -10(1) |
| O(6)  | 23(1) | 31(1) | 32(1) | -3(1) | -2(1)  | -13(1) |
| C(1)  | 22(2) | 24(2) | 32(2) | -3(2) | -2(2)  | -6(1)  |
| C(2)  | 19(2) | 27(2) | 28(2) | 1(1)  | -1(1)  | -8(1)  |
| C(3)  | 20(2) | 23(2) | 30(2) | 3(1)  | -2(1)  | -6(1)  |
| C(4)  | 26(2) | 23(2) | 28(2) | 0(2)  | 0(2)   | -8(1)  |
| C(5)  | 20(2) | 28(2) | 33(2) | -2(2) | -5(1)  | -4(1)  |
| C(6)  | 25(2) | 26(2) | 31(2) | 1(2)  | 0(1)   | -13(1) |

Table 10. Hydrogen coordinates ( $\times 10^4$ ) and isotropic displacement parameters ( $\text{\AA}^2 \times 10^3$ ) for **8**.

| Atom  | x        | y         | z         | U(eq)  |
|-------|----------|-----------|-----------|--------|
| H(2)  | 2494     | 6213      | 8737      | 46(12) |
| H(4)  | 1252     | -1206     | 5793      | 40     |
| H(5)  | 1553     | 604       | 8707      | 43(12) |
| H(4A) | -2304    | 5111      | 8240      | 41     |
| H(4B) | -2186    | 3924      | 7070      | 41     |
| H(4C) | -1071    | 5617      | 6977      | 41     |
| H(5A) | 1912     | 4699      | 5539      | 40     |
| H(5B) | 4360     | 3050      | 5150      | 40     |
| H(5C) | 4061     | 4381      | 6279      | 40     |
| H(6A) | 4420(40) | -2460(60) | 9850(40)  | 61(14) |
| H(6B) | 1990(60) | -1960(70) | 10290(30) | 64(15) |
